# Supplementary material for: Towards more personalized digital health interventions: a clustering method of action and coping plans to promote physical activity
Source: Springer Nature journal article supplement (doi:10.1186/s12889-022-14455-4), 2022-12-12
Supplement: MOESM2 [file 23816134]

Additional file 2. Additional Silhouette Analysis to identify subclusters of the three clusters of action plans.

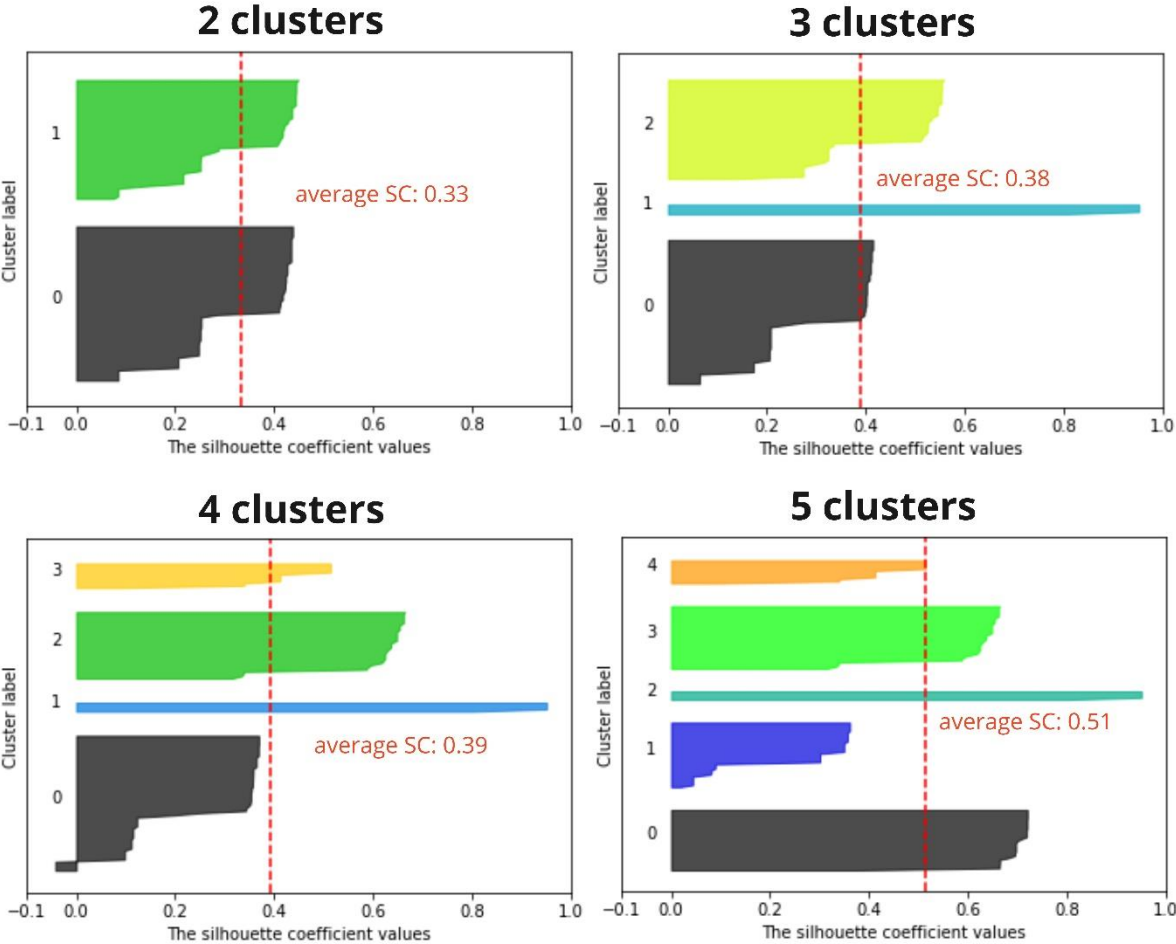

The hierarchical clustering of action plan cluster 1 resulted in 4 subclusters. The Silhouette Analysis for this clustering indicates that 4 clusters lead to the best clustering of the data. SC= silhouette coefficient.

### 2 clusters

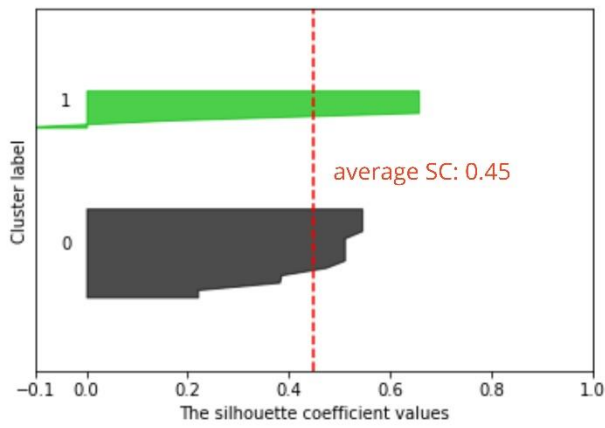

### 3 clusters

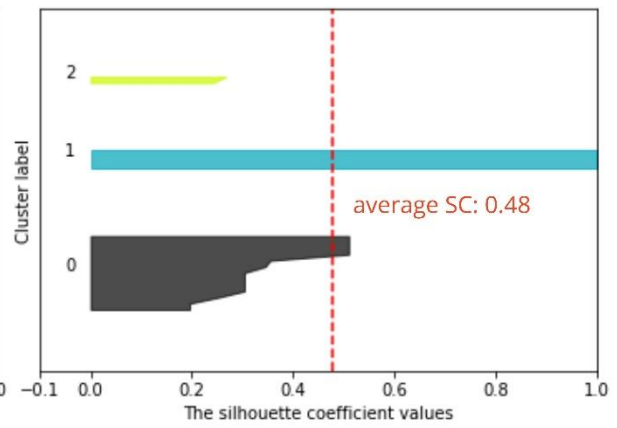

### 4 clusters

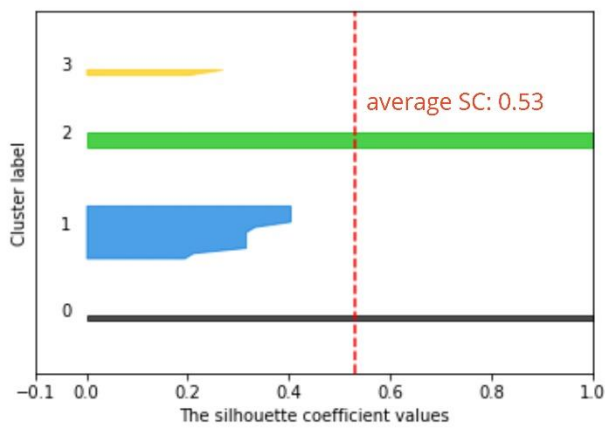

### 5 clusters

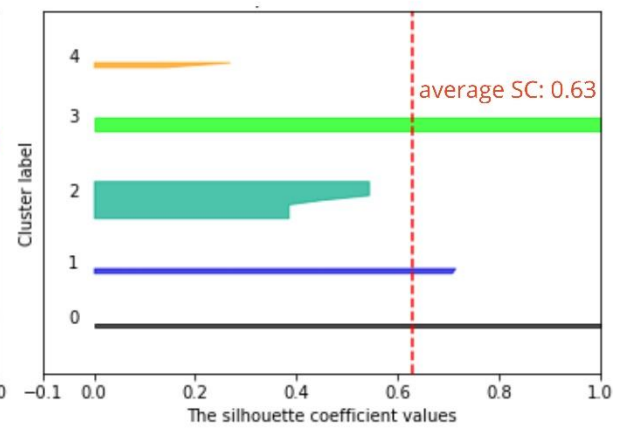

The hierarchical clustering of action plan cluster 2 resulted in 3 subclusters. The Silhouette Analysis for this clustering indicates that 3 clusters lead to the best clustering of the data. SC= silhouette coefficient.

### 2 clusters

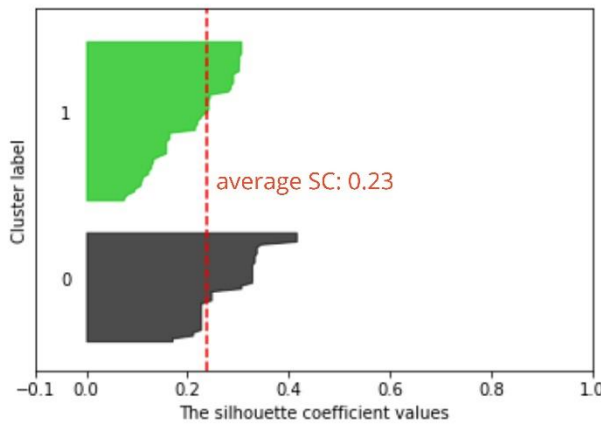

### 3 clusters

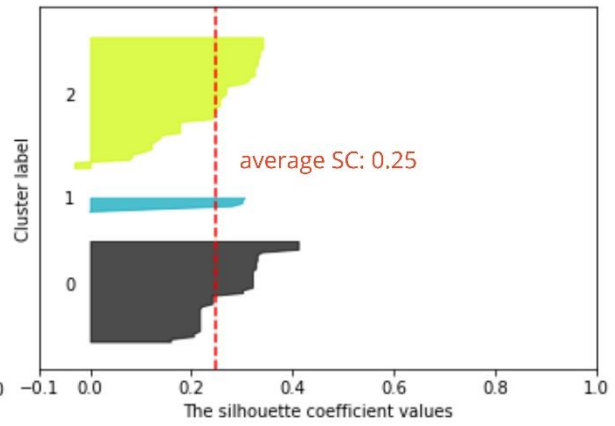

### 4 clusters

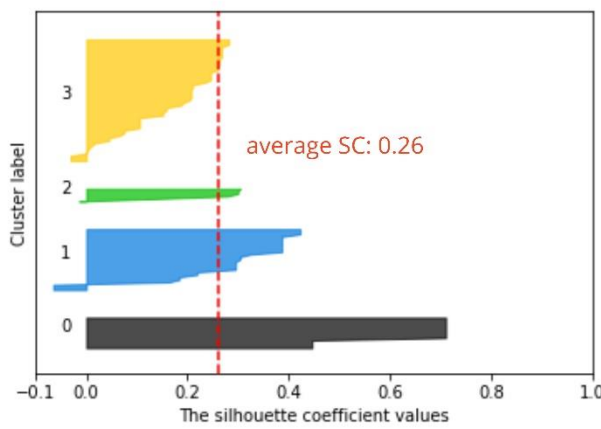

### 5 clusters

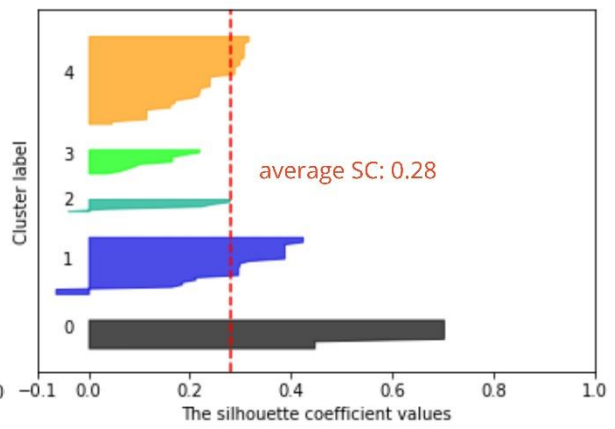

The hierarchical clustering of action plan cluster 3 resulted in 4 subclusters. The Silhouette Analysis for this clustering indicates that 4 clusters lead to the best clustering of the data. SC= silhouette coefficient.
